# Supplementary material for: Bioinformatics Analysis of Potential Key Genes in Trastuzumab-Resistant Gastric Cancer
Source: Hindawi journal article supplement (doi:10.1155/2019/1372571), 2019-12-20
Supplement: f1 [file 1372571.f1.pdf]

## Supplementary Materials:

**Figure S1.** The expression levels of ERBB2(a), VIM (b), EGR1(c), PSMB8 (d), IFI44 (e), IFI44L(f), IFIT2 (g), IFIT3 (h), ISG15 (i), OAS1 (j), OASL (k), SAMD9 (l), BST2 (m), IFI27 (n), IFIT1 (o), IFITM3 (p), MX1(q) and OAS2 (r) in gastric cancer (UALCAN data base). Red represents primary gastric cancer, Blue represents normal samples.

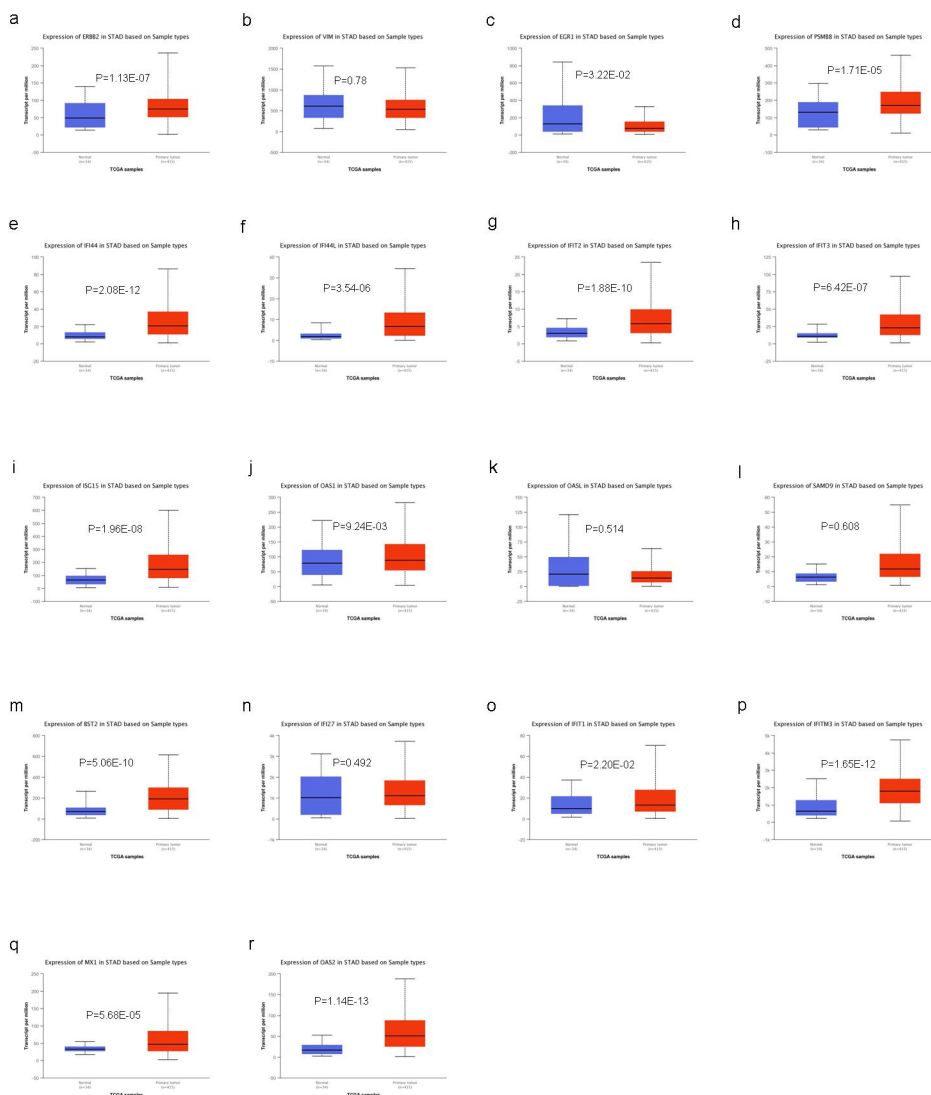

TABLE S1. Survival analyses of the hub genes in gastric cancer with different parameters.

| TABLE S1. Survival analyses of the hub genes in gastric cancer with different parameters. |                   |          |                   |         |                     |          |                     |          |                    |          |                   |         |
|-------------------------------------------------------------------------------------------|-------------------|----------|-------------------|---------|---------------------|----------|---------------------|----------|--------------------|----------|-------------------|---------|
| Parameters                                                                                | ERBB2 (210930_at) |          | VIM (201426s-at)  |         | EGR1 (201694_s_at)  |          | PSMB8 (209040_s_at) |          | IFI44 (214059_at)  |          | IFI44L(204439_at) |         |
|                                                                                           | HR (95% CI)       | P-value  | HR (95% CI)       | P-value | HR (95% CI)         | P-value  | HR (95% CI)         | P-value  | HR (95% CI)        | P-value  | HR (95% CI)       | P-value |
| <b>Gender</b>                                                                             |                   |          |                   |         |                     |          |                     |          |                    |          |                   |         |
| female                                                                                    | 1.38(0.96-1.98)   | 0.084    | 1.61(1.13-2.3)    | 0.0084  | 0.66(0.45-0.97)     | 0.032    | 0.44(0.29-0.67)     | 7.20E-05 | 1.81(1.26-2.6)     | 0.0011   | 1.29(0.91-1.84)   | 0.15    |
| male                                                                                      | 1.49(1.19-1.86)   | 5.00E-04 | 1.35(1.09-1.68)   | 0.0051  | 0.53(0.42-0.67)     | 2.70E-08 | 0.47(0.37-0.6)      | 1.10E-10 | 1.41(1.13-1.74)    | 0.0018   | 0.81(0.64-1.02)   | 0.073   |
| <b>Stage</b>                                                                              |                   |          |                   |         |                     |          |                     |          |                    |          |                   |         |
| I                                                                                         | 3.99(1.44-11.04)  | 0.004    | 2.04(0.73-5.68)   | 0.17    | 2.31(0.79-6.74)     | 0.11     | 0(0-hf)             | 0.0022   | 0.42(0.15-1.16)    | 0.083    | 0.43(0.16-1.14)   | 0.081   |
| II                                                                                        | 1.59(0.78-3.24)   | 0.2      | 2.22(1.19-4.16)   | 0.01    | 1.77(0.88-3.53)     | 0.1      | 0.34(0.19-0.63)     | 0.00034  | 1.51(0.82-2.77)    | 0.18     | 2.16(1.06-4.37)   | 0.029   |
| III                                                                                       | 1.65(0.18-2.31)   | 0.0032   | 1.51(1.13-2.01)   | 0.0047  | 0.79(0.59-1.05)     | 0.11     | 0.55(0.41-0.75)     | 0.00012  | 1.26(0.93-1.7)     | 0.13     | 0.83(0.6-1.13)    | 0.23    |
| IV                                                                                        | 0.8(0.54-1.17)    | 0.25     | 1.91(1.28-2.85)   | 0.0012  | 1.29(0.88-1.91)     | 0.19     | 0.49(0.33-0.73)     | 0.00039  | 0.62(0.4-0.97)     | 0.033    | 0.61(0.39-0.95)   | 0.027   |
| <b>Differentiation</b>                                                                    |                   |          |                   |         |                     |          |                     |          |                    |          |                   |         |
| poorly differentiated                                                                     | 1.56(1.04-2.33)   | 0.029    | 0.61(0.41-0.91)   | 0.015   | 1.19(0.77-1.82)     | 0.43     | 0.64(0.43-0.95)     | 0.025    | 1.5(0.99-2.29)     | 0.056    | 0.71(0.45-1.14)   | 0.15    |
| moderately differentiated                                                                 | 1.84(0.96-3.53)   | 0.061    | 2.01(1.01-4.03)   | 0.044   | 1.34(0.63-2.84)     | 0.45     | 0.72(0.36-1.41)     | 0.33     | 0.74(0.39-1.42)    | 0.36     | 1.35(0.63-2.87)   | 0.44    |
| well differentiated                                                                       | 2.18(0.84-5.7)    | 0.1      | 2.74(1.12-6.68)   | 0.021   | 2.76(0.93-8.23)     | 0.057    | 0.46(0.19-1.15)     | 0.091    | 3.15(1.31-7.55)    | 0.0069   | 3.82(1.38-10.6)   | 0.0059  |
| <b>Treatment</b>                                                                          |                   |          |                   |         |                     |          |                     |          |                    |          |                   |         |
| surgery alone                                                                             | 1.4(1.03-1.89)    | 0.03     | 1.45(1.08-1.93)   | 0.011   | 1.37(1.03-1.83)     | 0.03     | 0.44(0.31-0.63)     | 3.50E-06 | 1.34(0.96-1.89)    | 0.089    | 0.76(0.54-1.07)   | 0.12    |
| 5-FU based adjuvant                                                                       | 0.67(0.47-0.95)   | 0.022    | 0.62(0.44-0.89)   | 0.0077  | 0.46(0.3-0.7)       | 0.00025  | 1.35(0.91-2)        | 0.13     | 2.26(1.5-3.42)     | 7.00E-05 | 0.89(0.62-1.29)   | 0.55    |
| other adjuvant                                                                            | 0.51(0.17-1.54)   | 0.22     | 4.77(1.59-14.31)  | 0.0021  | 1.95(0.57-6.68)     | 0.28     | 0.09(0.01-0.66)     | 0.0027   | 4.75(1.1-20.46)    | 0.021    | 0.29(0.07-1.25)   | 0.078   |
| Parameters                                                                                | IFIT2 (217502_at) |          | IFIT3 (204747_at) |         | ISG15 (205483_s_at) |          | OAS1 (202869_at)    |          | OASL (210797_s_at) |          | ASMD9 (219691_at) |         |
|                                                                                           | HR (95% CI)       | P-value  | HR (95% CI)       | P-value | HR (95% CI)         | P-value  | HR (95% CI)         | P-value  | HR (95% CI)        | P-value  | HR (95% CI)       | P-value |
| <b>Gender</b>                                                                             |                   |          |                   |         |                     |          |                     |          |                    |          |                   |         |
| female                                                                                    | 1.61(1.05-2.48)   | 0.029    | 1.27(0.88-1.83)   | 0.21    | 0.8(0.54-1.17)      | 0.25     | 1.25(0.88-1.78)     | 0.21     | 1.36(0.96-1.93)    | 0.082    | 0.56(0.38-0.82)   | 0.003   |
| male                                                                                      | 1.34(1.08-1.67)   | 0.0075   | 1.19(0.96-1.48)   | 0.1     | 0.87(0.69-1.11)     | 0.27     | 0.86(0.7-1.07)      | 0.17     | 1.21(0.94-1.56)    | 0.14     | 0.69(0.56-0.86)   | 0.00092 |
| <b>Stage</b>                                                                              |                   |          |                   |         |                     |          |                     |          |                    |          |                   |         |
| I                                                                                         | 0.32(0.12-0.89)   | 0.022    | 0.41(0.14-1.18)   | 0.087   | 0.33(0.11-1.03)     | 0.046    | 0.4(0.15-1.09)      | 0.064    | 0.37(0.14-0.99)    | 0.039    | 0.18(0.04-0.78)   | 0.0096  |
| II                                                                                        | 1.73(0.95-3.16)   | 0.068    | 2.04(0.91-4.61)   | 0.078   | 0.61(0.28-1.3)      | 0.19     | 1.91(1.04-3.5)      | 0.034    | 1.94(1.07-3.52)    | 0.026    | 0.66(0.34-1.26)   | 0.2     |
| III                                                                                       | 1.38(1.03-1.85)   | 0.029    | 1.28(0.96-1.71)   | 0.097   | 0.82(0.59-1.15)     | 0.25     | 0.7(0.53-0.94)      | 0.016    | 0.76(0.55-1.05)    | 0.092    | 0.55(0.4-0.74)    | 0.00009 |
| IV                                                                                        | 1.72(1.15-2.56)   | 0.0072   | 0.75(0.51-1.11)   | 0.15    | 0.73(0.5-1.07)      | 0.1      | 0.79(0.51-1.21)     | 0.28     | 0.76(0.49-1.17)    | 0.21     | 1.22(0.83-1.79)   | 0.3     |
| <b>Differentiation</b>                                                                    |                   |          |                   |         |                     |          |                     |          |                    |          |                   |         |
| poorly differentiated                                                                     | 1.49(0.92-2.42)   | 0.1      | 0.73(0.45-1.18)   | 0.2     | 1.31(0.85-2.02)     | 0.23     | 1.61(1.05-2.47)     | 0.026    | 0.74(0.47-1.17)    | 0.2      | 0.72(0.47-1.1)    | 0.13    |
| moderately differentiated                                                                 | 1.73(0.76-3.95)   | 0.19     | 1.51(0.78-2.94)   | 0.22    | 2.65(1.23-5.71)     | 0.0096   | 0.62(0.29-1.32)     | 0.21     | 1.52(0.73-3.15)    | 0.26     | 2.01(1.05-3.87)   | 0.033   |
| well differentiated                                                                       | 10.5(4-78.81)     | 0.0046   | 4.74(1.38-16.24)  | 0.0065  | 2.35(0.79-7)        | 0.11     | 0.51(0.2-1.32)      | 0.16     | 0.49(0.19-1.27)    | 0.13     | 1.64(0.55-4.88)   | 0.37    |
| <b>Treatment</b>                                                                          |                   |          |                   |         |                     |          |                     |          |                    |          |                   |         |
| surgery alone                                                                             | 0.9(0.66-1.23)    | 0.52     | 0.77(0.57-1.05)   | 0.1     | 0.65(0.46-0.94)     | 0.02     | 0.78(0.59-1.04)     | 0.095    | 0.79(0.59-1.05)    | 0.11     | 0.64(0.46-0.87)   | 0.0049  |
| 5-FU based adjuvant                                                                       | 0.55(0.38-0.79)   | 0.0011   | 1.31(0.93-1.85)   | 0.12    | 2.0(1.38-2.88)      | 0.00016  | 1.69(1.16-2.46)     | 0.006    | 0.73(0.51-1.05)    | 0.089    | 0.72(0.5-1.06)    | 0.095   |
| other adjuvant                                                                            | 2.63(0.88-7.88)   | 0.072    | 0.59(0.24-1.44)   | 0.24    | 0.59(0.24-1.49)     | 0.26     | 0.52(0.22-1.25)     | 0.14     | 0.36(0.11-1.24)    | 0.093    | 0.4(0.15-1.11)    | 0.07    |
| Parameters                                                                                | BST2 (201641_at)  |          | IFI27 (202411_at) |         | IFIT1 (203153_at)   |          | IFITM3 (212203x_at) |          | MX1 (202086_at)    |          | OAS2 (204972_at)  |         |
|                                                                                           | HR (95% CI)       | P-value  | HR (95% CI)       | P-value | HR (95% CI)         | P-value  | HR (95% CI)         | P-value  | HR (95% CI)        | P-value  | HR (95% CI)       | P-value |
| <b>Gender</b>                                                                             |                   |          |                   |         |                     |          |                     |          |                    |          |                   |         |
| female                                                                                    | 0.42(0.26-0.68)   | 0.00031  | 0.57(0.39-0.86)   | 0.0058  | 0.82(0.56-1.18)     | 0.28     | 0.88(0.61-1.25)     | 0.47     | 1.3(0.88-1.91)     | 0.19     | 0.68(0.48-0.97)   | 0.032   |
| male                                                                                      | 0.79(0.63-1)      | 0.049    | 0.75(0.6-0.93)    | 0.008   | 0.72(0.58-0.91)     | 0.0045   | 1.23(0.98-1.55)     | 0.069    | 1.3(1.03-1.65)     | 0.03     | 1.1(0.89-1.36)    | 0.39    |
| <b>Stage</b>                                                                              |                   |          |                   |         |                     |          |                     |          |                    |          |                   |         |
| I                                                                                         | 0.19(0.04-0.84)   | 0.014    | 0.42(0.16-1.13)   | 0.076   | 0.36(0.13-0.96)     | 0.032    | 0.51(0.19-1.42)     | 0.19     | 0.3(0.07-1.31)     | 0.088    | 0.27(0.09-0.85)   | 0.017   |
| II                                                                                        | 0.69(0.37-1.25)   | 0.22     | 0.62(0.32-1.18)   | 0.14    | 2.41(1.07-5.43)     | 0.028    | 0.72(0.38-1.36)     | 0.31     | 2.06(0.87-4.89)    | 0.094    | 1.66(0.9-3.09)    | 0.1     |
| III                                                                                       | 0.74(0.55-0.98)   | 0.036    | 0.6(0.45-0.81)    | 0.00051 | 0.62(0.45-0.85)     | 0.0029   | 1.79(1.26-2.55)     | 0.001    | 1.39(1-1.94)       | 0.049    | 0.78(0.55-1.1)    | 0.15    |
| IV                                                                                        | 0.67(0.44-1.04)   | 0.072    | 0.59(0.4-0.87)    | 0.0066  | 0.72(0.48-1.08)     | 0.11     | 0.77(0.52-1.13)     | 0.17     | 0.43(0.43-1.03)    | 0.068    | 0.67(0.46-0.99)   | 0.042   |
| <b>Differentiation</b>                                                                    |                   |          |                   |         |                     |          |                     |          |                    |          |                   |         |
| poorly differentiated                                                                     | 0.55(0.37-0.82)   | 0.0026   | 0.71(0.47-1.05)   | 0.086   | 0.78(0.49-1.25)     | 0.31     | 1.38(0.92-2.06)     | 0.11     | 0.82(0.54-1.25)    | 0.35     | 0.66(0.43-1.01)   | 0.055   |
| moderately differentiated                                                                 | 2.26(0.99-5.18)   | 0.048    | 1.83(0.95-3.51)   | 0.068   | 1.45(0.76-2.77)     | 0.26     | 0.6(0.27-1.32)      | 0.2      | 2.15(1.07-4.31)    | 0.027    | 1.87(0.9-3.89)    | 0.091   |
| well differentiated                                                                       | 4.11(1.12-14.13)  | 0.015    | 0.61(0.26-1.44)   | 0.25    | 2.78(1.077.22)      | 0.028    | 4.71(1.09-20.3)     | 0.022    | 2.53(1.04-6.15)    | 0.035    | 0.62(0.26-1.48)   | 0.28    |
| <b>Treatment</b>                                                                          |                   |          |                   |         |                     |          |                     |          |                    |          |                   |         |
| surgery alone                                                                             | 0.57(0.39-0.84)   | 0.0035   | 0.57(0.4-0.82)    | 0.0017  | 0.86(0.64-1.16)     | 0.33     | 1.22(0.89-1.68)     | 0.21     | 0.8(0.58-1.09)     | 0.16     | 0.74(0.55-0.98)   | 0.037   |
| 5-FU based adjuvant                                                                       | 0.77(0.52-1.14)   | 0.2      | 1.55(0.9-2.21)    | 0.015   | 0.68(0.48-0.96)     | 0.026    | 1.5(1.05-2.16)      | 0.026    | 1.68(1.17-2.41)    | 0.0044   | 1.72(1.2-2.47)    | 0.003   |
| other adjuvant                                                                            | 1.84(0.76-4.46)   | 0.17     | 0.11(0.01-0.81)   | 0.0084  | 1.54(0.56-4.25)     | 0.4      | 3.14(0.92-10.72)    | 0.054    | 0.53(0.19-1.45)    | 0.21     | 0.45(0.16-1.24)   | 0.11    |
